# Supplementary material for: Development and application of a CNT–Ag–Cu–Al/PS-based paper electrode for detecting diverse analytes in complex matrices
Source: Royal Society of Chemistry journal article supplement (doi:10.1039/d4ay00550c), 2024-01-01
Supplement: d4ay00550c1.pdf [file d4ay00550c1.pdf]

## Supplementary Information

### **Development and Application of CNT-Ag-Cu-Al/PS-Based Paper Electrode for Detecting Diverse Analytes in Complex Matrices**

Zhiming Zhang,<sup>a</sup> Lixuan Zhu,<sup>a</sup> Yan Zhang,<sup>a</sup> Yanan Zong,<sup>a,b</sup> Yun Li,<sup>a</sup> Yajun Zheng,<sup>a</sup> Mei Meng,<sup>a</sup> and Zhiping Zhang,<sup>\*a</sup>

<sup>a</sup> School of Chemistry and Chemical Engineering, Xi'an Shiyou University, Xi'an 710065, China

<sup>b</sup> Xianyang Product Quality Supervision and Inspection Institute, Shaanxi Xianyang 712000, China

\* To whom correspondence should be addressed. E-mail: zhipingzhang@xsyu.edu.cn

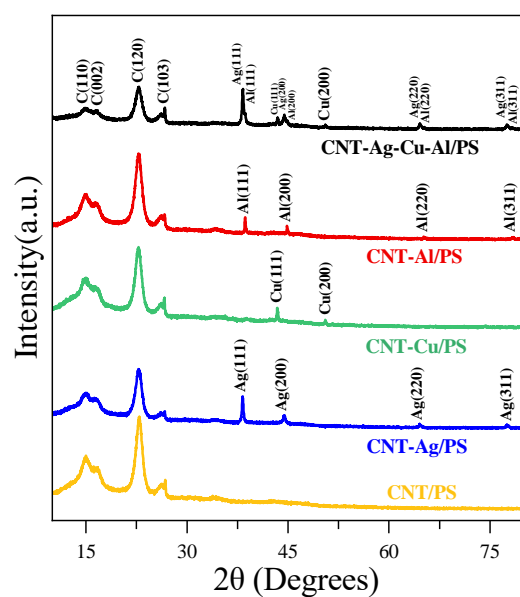

**Fig. S1** XRD patterns of the different paper-based electrodes.

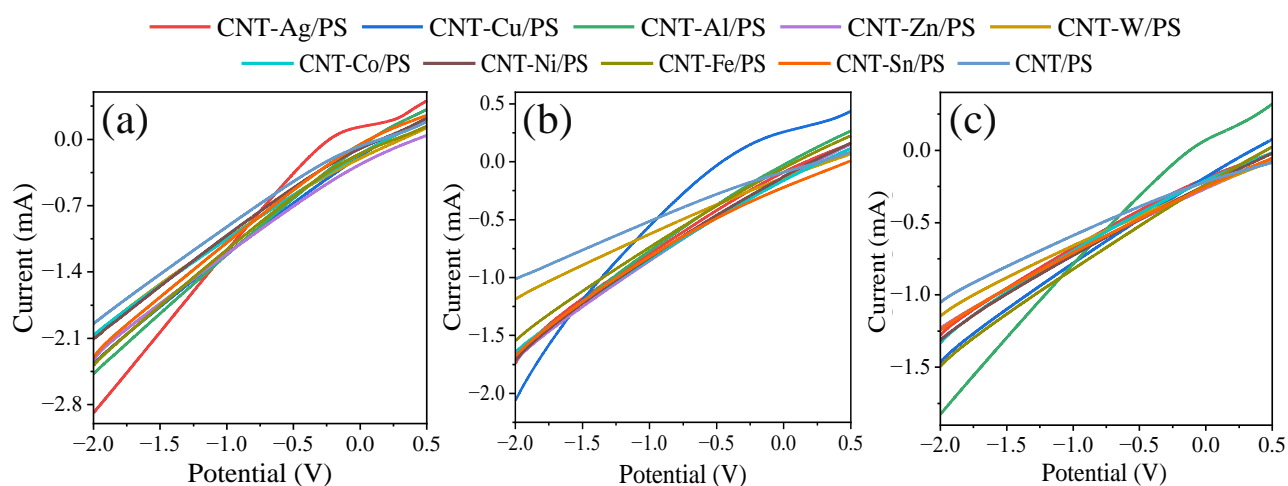

**Fig. S2** Comparison of the LSV curves of different types of metallic paper electrodes for the detection of 100  $\mu\text{M}$  Glc in 0.1 M  $\text{Na}_2\text{SO}_4$  (a), 10  $\mu\text{M}$  OTC in 0.1 M  $\text{NaOH}$  (b), and 20  $\mu\text{M}$  HQ in 0.1 M PBS buffer (c), with all test sweeps at 50  $\text{mV s}^{-1}$ .

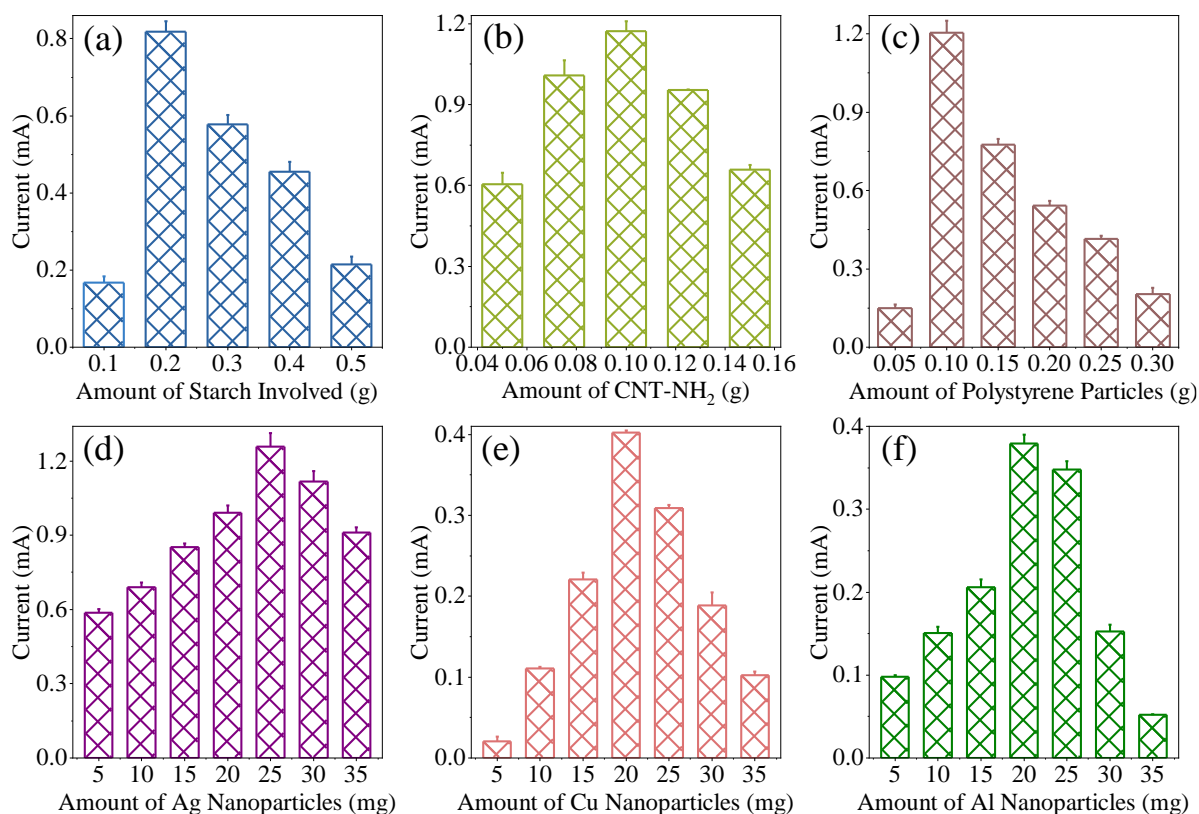

**Fig. S3** Effects of different experimental parameters on the electrochemical performance of CNT-Ag-Cu-Al/PS paper electrode: (a) amount of starch involved, (b) amount of CNT-NH<sub>2</sub> particles, (c) amount of PS particles involved, (d) amount of AgNPs, (e) amount of CuNPs, and (f) amount of AlNPs.

**Table S1** Fitting equivalent circuit parameters of different fabricated electrodes immersed in 0.1 M KCl, 5.0 mM K<sub>3</sub>[Fe (CN)<sub>6</sub>], and 5.0 mM K<sub>4</sub>[Fe(CN)<sub>6</sub>].

| Electrode type | Electrode name  | R <sub>s</sub> (Ω) | R <sub>ct1</sub> (Ω) | R <sub>ct2</sub> (Ω) | CPE1 (μF) | CPE2 (μF) |
|----------------|-----------------|--------------------|----------------------|----------------------|-----------|-----------|
| 1              | CNT-Ag-Cu-Al/PS | 19.9               | 441.0                | 445.9                | 0.971     | 0.453     |
| 2              | CNT-Ag/PS       | 26.0               | 477.0                | 487.8                | 0.986     | 0.429     |
| 3              | CNT-Cu/PS       | 25.8               | 509.3                | 545.8                | 0.964     | 0.648     |
| 4              | CNT-Al/PS       | 33.1               | 567.6                | 606.7                | 1.100     | 0.729     |
| 5              | CNT-Zn/PS       | 116.4              | 698.8                | 827.4                | 1.029     | 0.570     |
| 6              | CNT-W/PS        | 117.7              | 708.0                | 828.8                | 1.021     | 0.572     |
| 7              | CNT-Co/PS       | 94.8               | 757.7                | 897.1                | 0.988     | 0.636     |
| 8              | CNT-Ni/PS       | 13.4               | 787.7                | 804.1                | 0.963     | 0.374     |
| 9              | CNT-Fe/PS       | 92.1               | 790.7                | 714.7                | 0.964     | 0.143     |
| 10             | CNT-Sn/PS       | 151.6              | 880.7                | 1056.0               | 1.027     | 0.618     |
| 11             | CNT/PS          | 66.8               | 969.4                | 1064.0               | 0.988     | 0.299     |

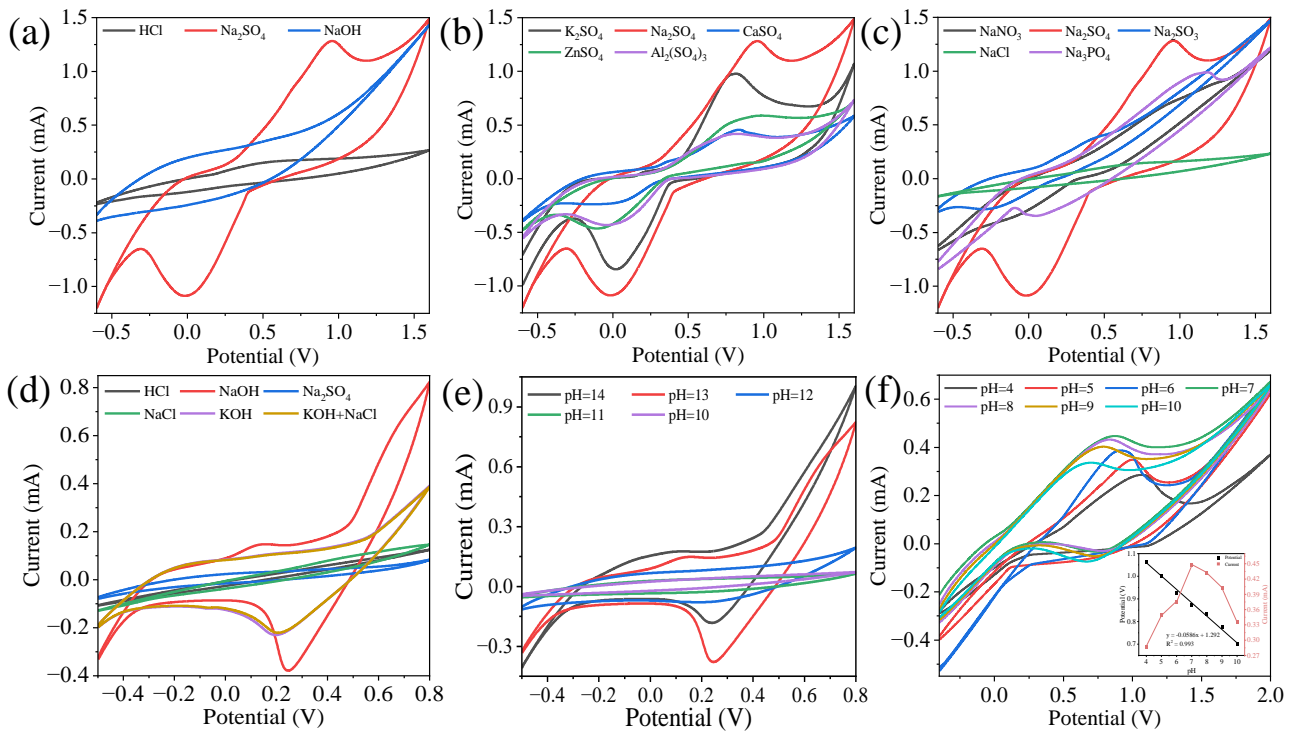

**Fig. S4** Comparison of CV curves of CNT-Ag-Cu-Al/PS paper electrodes for the detection of Glc in (a) acidic, neutral and alkaline, (b) metal salts containing various cations, and (c) metal salts containing various anions as electrolyte solutions; comparison of CV curves of CNT-Ag-Cu-Al/PS paper electrodes for the detection of OTC in (d) acidic, neutral and alkaline and (e) NaOH as an electrolyte solution at different pH, and (f) comparison of CV curves of CNT-Ag-Cu-Al/PS paper electrodes for the detection of HQ in PBS buffer solution at different pH.

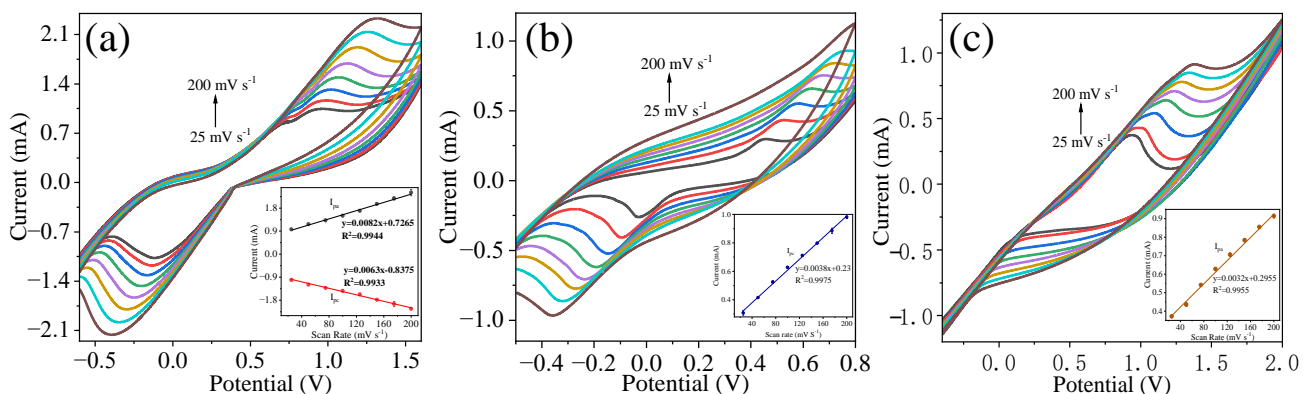

**Fig. S5** CV curves of Glc (a), OTC (b) and HQ (c) at CNT-Ag-Cu-Al/PS paper electrodes in the scanning range of 25-200 mV s<sup>-1</sup>, and their corresponding calibration plot of I<sub>p</sub> vs V

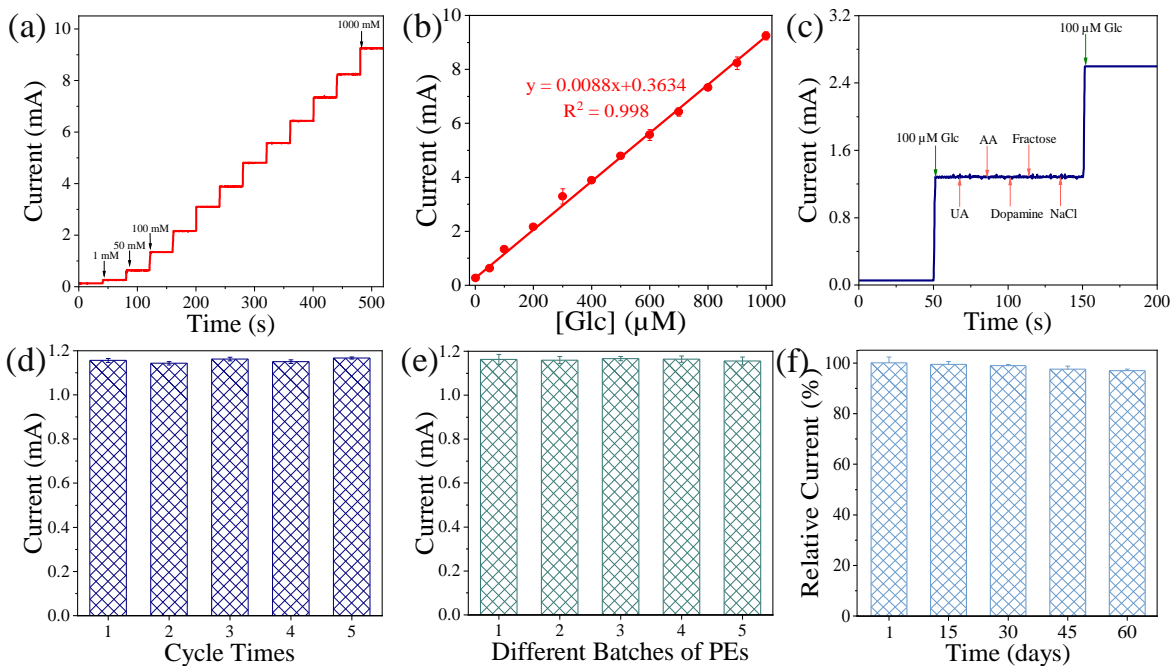

**Fig. S6** (a) steady-state current-time responses of Glc at the CNT-Ag-Cu-Al/PS paper electrode at +0.50 V in 0.1 M Na<sub>2</sub>SO<sub>4</sub>, and (b) calibration curve (current vs. concentration) of Glc (n=3); (c) add different interferers to explore the anti-interference of the detection process; (d) reproducibility and (e) response stability of different batches of the CNT-Ag-Cu-Al/PS paper electrode for Glc detection, and (f) long-term stability of the paper electrode.

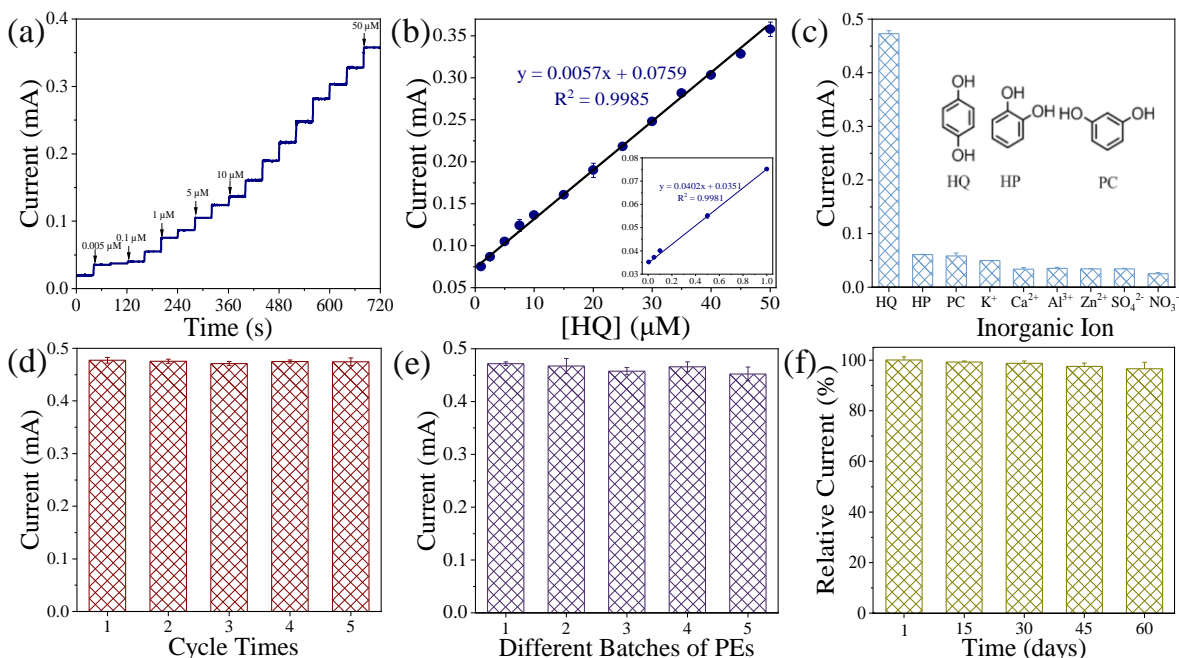

**Fig. S7** (a) steady-state current-time responses of HQ at the CNT-Ag-Cu-Al/PS paper electrode at +0.50 V in 0.1 M PBS buffer, and (b) calibration curve (current vs concentration) of HQ (n=3); (c) add different interferers to explore the anti-interference of the detection process; (d) reproducibility and (e) response stability of different batches of the CNT-Ag-Cu-Al/PS paper electrode for HQ detection, and (f) long-term stability of the paper electrode.

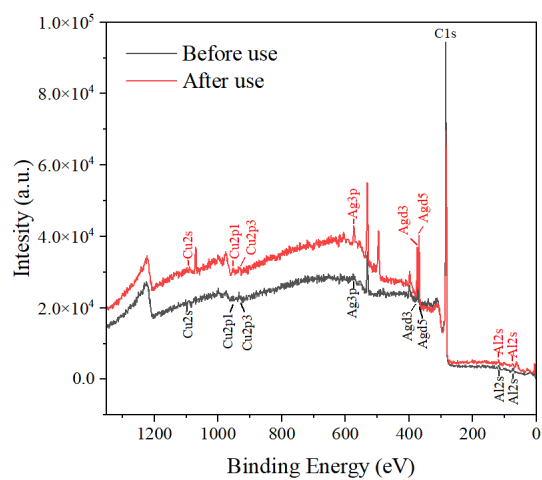

**Fig. S8** XPS analysis of CNT-Ag-Cu-Al/PS paper electrode before and after use.
